# Supplementary material
Source: Springer Nature journal article supplement (https://www.springermedizin.de/resource/supplementary/12911_2010_355_MOESM5_ESM.pdf/9525560)

# Value Clarification Exercise Score and CRC Screening Preference

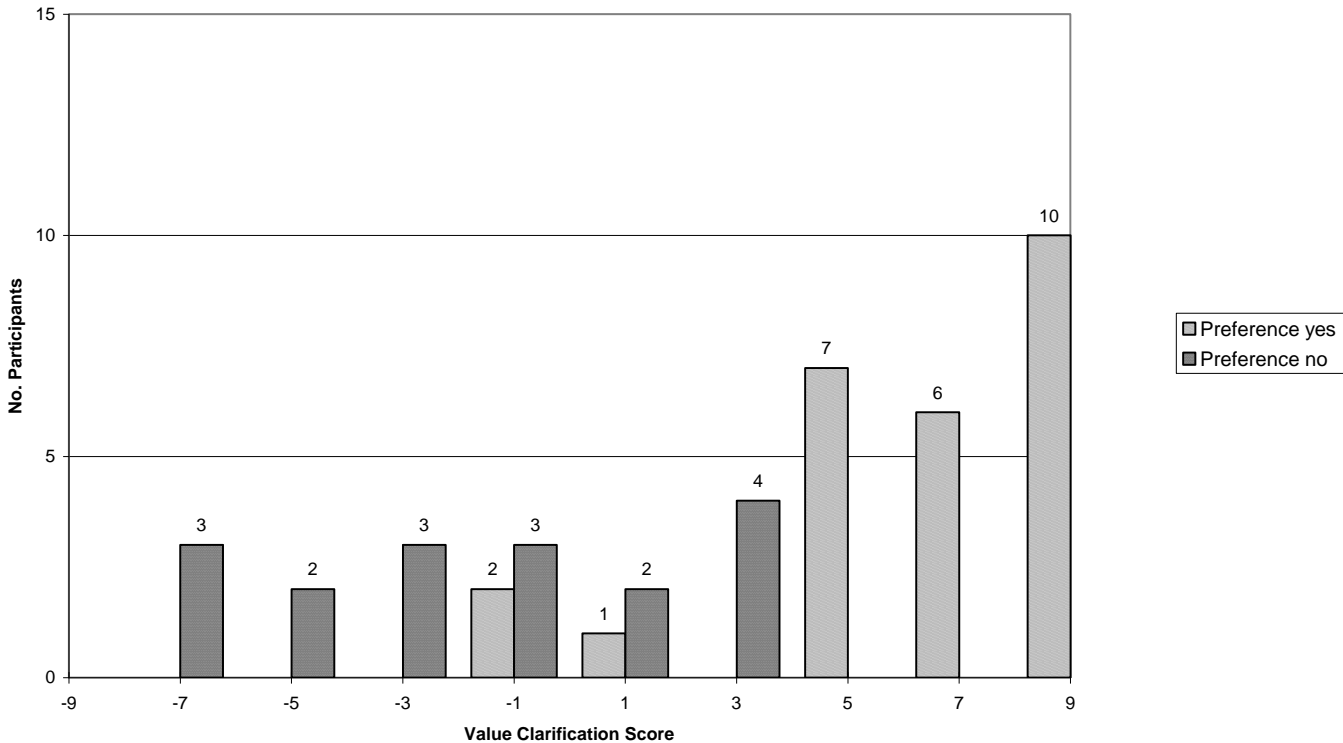

Supplement: MOESM5 [file 9525560]
